# Supplementary material for: Computer modelling of trace SO2 and NO2 removal from flue gases by utilizing Zn(ii) MOF catalysts
Source: Royal Society of Chemistry journal article supplement (doi:10.1039/d3nj01805a), 2023-01-01
Supplement: d3nj01805a1.pdf [file d3nj01805a1.pdf]

## Supporting Information

# Computer modelling of SO<sub>2</sub> and NO<sub>2</sub> capture and conversion in flue gases by optimised Zn(II) MOF catalysts.

D. Muthukumar<sup>a,c</sup>, C. M. Nagaraja<sup>d</sup>, Michael Badawi<sup>\*c</sup> and Renjith S. Pillai<sup>\*ab</sup>.

- [a] D. Muthukumar,  
Department of Chemistry,  
Christ Deemed to be University, Bangalore,  
Karnataka, India.  
Email: [renjithspillai@gmail.com](mailto:renjithspillai@gmail.com)
- [b] Renjith S. Pillai,  
Vikram Sarabhai Space Center,  
Trivandrum, Kerala, India.  
Email: [renjithspillai@gmail.com/renjith\\_sp@vssc.gov.in](mailto:renjithspillai@gmail.com/renjith_sp@vssc.gov.in)
- [b] Michael Badawi,  
Laboratoire de Physique et Chimie Théoriques UMR CNRS 7019  
Université de Lorraine,  
Nancy, France  
Email: [micahel.badawi@univ-lorraine.fr](mailto:micahel.badawi@univ-lorraine.fr)
- [c] C.M.Nagaraja,  
Department of Chemistry,  
Indian Institute of Technology, Ropar,  
Rupnagar-140001,  
Punjab, India.

## 1. DFT optimized structures of HbMOF series with various ligands:

In the partially fluorinated HbMOF-1, it contains long-chain dicarboxylate ligand and melamine as a co-ligand utilizing Zinc as a metal centre. From here, we designed three more hypothetical frameworks by exchanging the ligands.

### 1.1. Density Functional Theory Calculations:

The obtained series of HbMOF were optimized through PBE<sup>1,2</sup> functional via the DFT theory implemented in CP2K package<sup>3</sup>. The DFT calculations were performed by Unrestricted Kohn-Sham with spin multiplicity<sup>4</sup>. For carbon, nitrogen, oxygen, and fluorine atoms in the framework, triple zeta (TZVP-MOLOPT) were considered and for Zinc atom double zeta (DZVP-MOLOPT) was considered as the basis set<sup>5</sup>. Further van der Waals corrections were applied via the DFT-D3 method<sup>6</sup>.

### 1.2. Inter atomic potential:

The overall interaction that occurred between the MOFs and guest molecules were modelled via a combination of Lennard-Jones and columbic term. For the simulation adsorption isotherm, we have implemented DRIEDING<sup>7</sup> and UFF<sup>8</sup> force fields. We have used the UFF force field for the transition metals and DRIEDING for all other atoms in the framework. In this work, all the LJ parameters were elucidated by UFF and DRIEDING forcefield potentials for all the simulations. Here, the NO<sub>2</sub> modelled from the work of Bourasseau *et al*<sup>9</sup> model and SO<sub>2</sub> from the used model of Potoff *et al*<sup>10</sup>. The atomic point charges for all the frameworks were obtained from the REPEAT method suggested by Campana *et al*<sup>11</sup>. which is successfully implemented in the CP2K package.

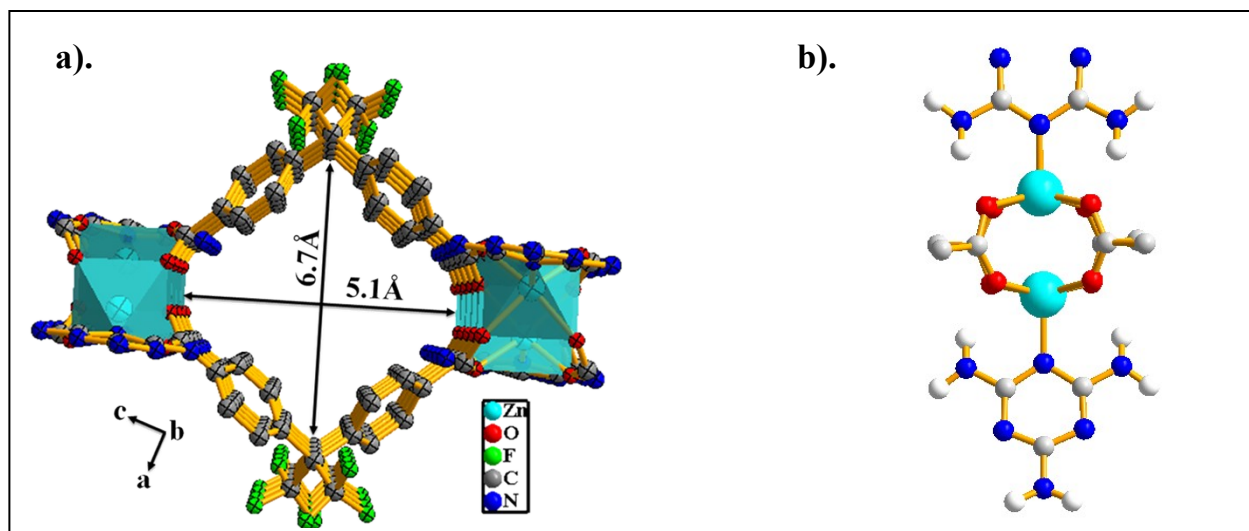

**Figure S1:** Graphical representation of (a) Pore channel of HbMOF1, and (b) a 4-connected view of paddle wheel Zn(II) metal site with the carboxylate linker.

**Table S1.** LJ potential parameters for all the atoms of HbMOF series:

| Atom type | LJ                   |              |
|-----------|----------------------|--------------|
|           | $\epsilon / k_B$ (K) | $\sigma$ (Å) |
| C         | 47.857               | 3.4730       |
| H         | 7.6490               | 2.8460       |
| N         | 34.724               | 3.6620       |
| O         | 30.190               | 3.1200       |
| F         | 38.975               | 3.0930       |

|           |        |        |
|-----------|--------|--------|
| <b>Zn</b> | 27.680 | 4.0500 |
|-----------|--------|--------|

**Table S2.** Partial charges for all the atoms of HbMOF1 derived by REPEAT method:

| <b>Interaction</b> | <b>Charge <math>q</math> (<math>e</math>)</b> |
|--------------------|-----------------------------------------------|
| <b>atoms/sites</b> |                                               |
| <b>C1</b>          | 0.615                                         |
| <b>C2</b>          | -0.453                                        |
| <b>C3</b>          | 0.373                                         |
| <b>C3A</b>         | -0.134                                        |
| <b>C4</b>          | 0.003                                         |
| <b>C4A</b>         | -0.0642                                       |
| <b>C5</b>          | 0.5990                                        |
| <b>C6</b>          | 0.883                                         |
| <b>H1</b>          | 0.395                                         |
| <b>H2</b>          | 0.268                                         |
| <b>H3</b>          | 0.252                                         |
| <b>N1</b>          | -0.556                                        |
| <b>N2</b>          | -0.718                                        |

**N3** -0.697

**N4** -1.073

**Zn1** 0.909

**O1** -0.434

**F1** -0.168

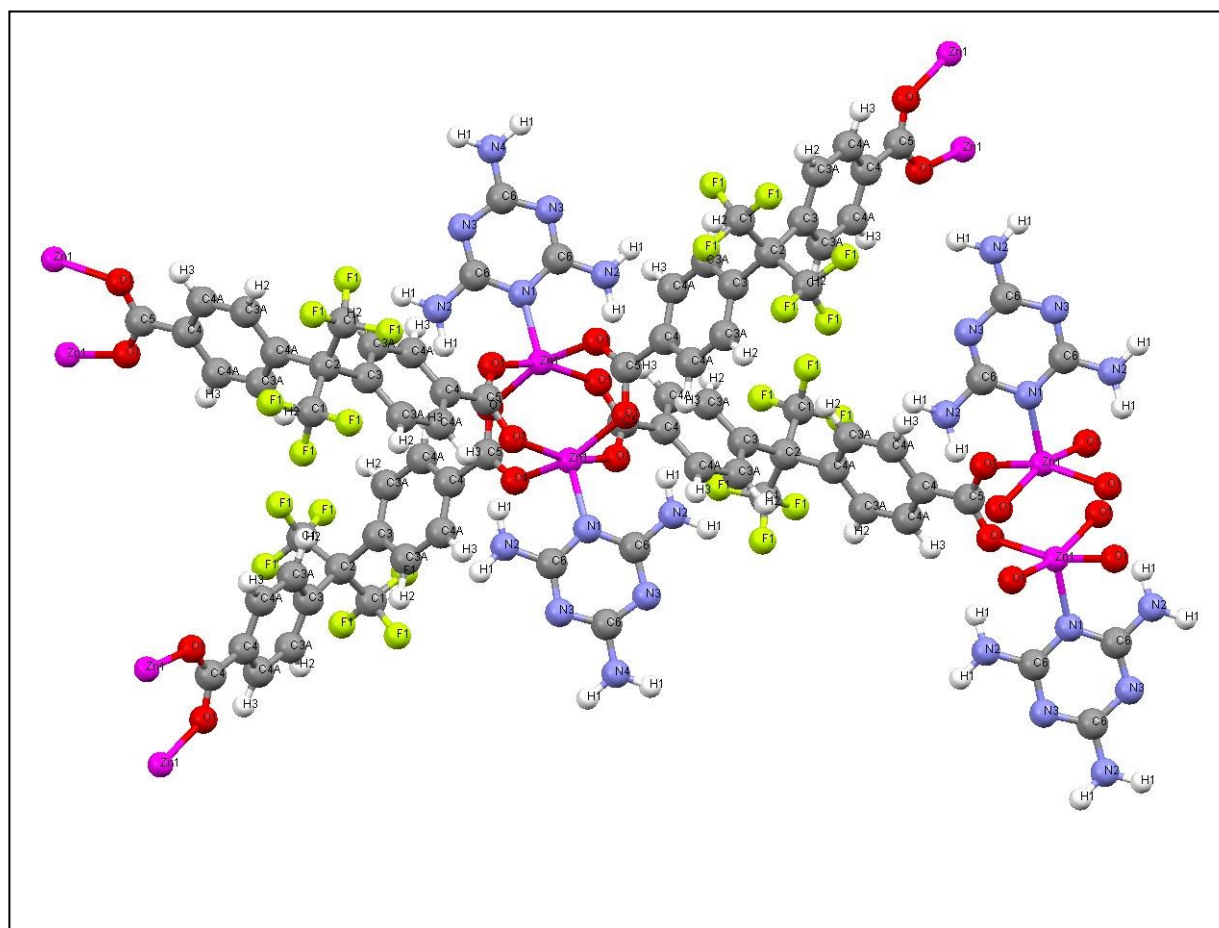

**Figure-S2:** Labels of the atoms for the HbMOF1 framework.

### 1.3. GCMC simulations:

The simulated adsorption isotherm for the toxic gases such as  $\text{NO}_2$  and  $\text{SO}_2$  on the HbMOF series were carried out via the Grand canonical Monte Carlo method and the simulations were conducted at the 298K and the pressure ranging from 0.1 to 1 bar using RASPA code<sup>12</sup>. The model corresponds to adsorbate and the dispersion forces in short ranges were explained with the help of Lennard–Jones potential parameters and the Ewald method was applied for coulombic interaction. within the cutoff of 12 Å. The fugacity of species was calculated via the Peng-Robinson equation of states<sup>13</sup>. The adsorption enthalpy ( $\Delta H$ ) was calculated based on the NVT ensemble by using revised Wisdom’s test particle insertion method<sup>14</sup>.

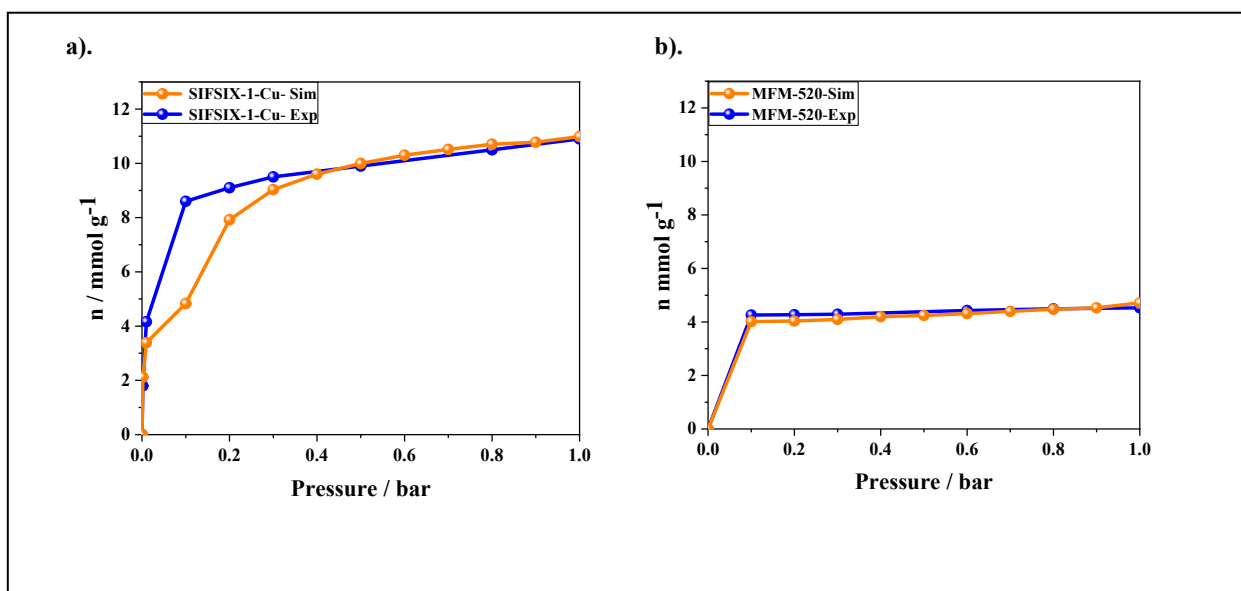

**Figure S3:** Comparison between the simulated and experimental adsorption isotherm of  $\text{SO}_2$  (a) gas on SIFSIX-1-Cu and  $\text{NO}_2$  (b) gas on MFM-520 using three site gas model.

#### 1.4. Atomic Co-ordinates HbMOF series:

**Table S3: Atomic coordinates of HbMOF1**

|     |         |         |         |
|-----|---------|---------|---------|
| Zn1 | 0.54668 | 0.11653 | 0.98511 |
| O1  | 0.67722 | 0.03608 | 0.02031 |
| O1  | 0.6073  | 0.86157 | 0.03636 |
| F1  | 0.12769 | 0.93082 | 0.17041 |
| O1  | 0.99971 | 0.64875 | 0.42308 |
| F1  | 0.03366 | 0.55326 | 0.08318 |
| C1  | 0.09862 | 0.64658 | 0.08245 |
| C1  | 0.15596 | 0.83367 | 0.13835 |
| O1  | 0.05611 | 0.46557 | 0.39935 |
| F1  | 0.23842 | 0.78656 | 0.16969 |
| C4  | 0.78099 | 0.88625 | 0.06106 |
| N1  | 0.59549 | 0.28461 | 0.96671 |
| F1  | 0.19376 | 0.60361 | 0.09327 |
| N3  | 0.5699  | 0.46294 | 0.90729 |
| C3A | 0.10339 | 0.58266 | 0.21709 |
| H2  | 0.14728 | 0.52959 | 0.18627 |
| C3A | 0.88024 | 0.73106 | 0.11193 |
| H2  | 0.88395 | 0.64506 | 0.1349  |
| F1  | 0.09427 | 0.69141 | 0.02361 |
| N3  | 0.65495 | 0.47049 | 0.00875 |
| F1  | 0.18465 | 0.874   | 0.08272 |
| N2  | 0.51488 | 0.2826  | 0.8685  |
| H1  | 0.49672 | 0.32738 | 0.82883 |
| H1  | 0.52405 | 0.1927  | 0.86667 |
| C4A | 0.96874 | 0.79706 | 0.10604 |
| N2  | 0.69028 | 0.29567 | 0.06047 |
| H1  | 0.73623 | 0.34537 | 0.08891 |
| H1  | 0.70014 | 0.20616 | 0.05926 |
| C4  | 0.04157 | 0.61178 | 0.31985 |
| C3A | 0.96196 | 0.90795 | 0.07666 |
| H2  | 0.02886 | 0.96176 | 0.07058 |
| C4A | 0.8689  | 0.95233 | 0.05498 |
| H3  | 0.86395 | 0.03288 | 0.03266 |
| C4A | 0.09429 | 0.54418 | 0.27801 |
| H3  | 0.12962 | 0.46159 | 0.29361 |
| C3A | 0.0049  | 0.75631 | 0.23885 |
| H2  | 0.96953 | 0.83958 | 0.22393 |
| C4A | 0.99655 | 0.71862 | 0.29974 |

|            |         |         |         |
|------------|---------|---------|---------|
| <b>H3</b>  | 0.95521 | 0.77122 | 0.3323  |
| <b>C2</b>  | 0.0691  | 0.74135 | 0.13126 |
| <b>C5</b>  | 0.68097 | 0.93388 | 0.03749 |
| <b>C4A</b> | 0.78763 | 0.77447 | 0.08946 |
| <b>H3</b>  | 0.71955 | 0.72231 | 0.0943  |
| <b>C5</b>  | 0.03181 | 0.57239 | 0.38559 |
| <b>C3</b>  | 0.05802 | 0.68887 | 0.19664 |
| <b>N2</b>  | 0.6156  | 0.64108 | 0.9533  |
| <b>H1</b>  | 0.63311 | 0.68906 | 0.99238 |
| <b>H1</b>  | 0.57093 | 0.68243 | 0.92033 |
| <b>C6</b>  | 0.64676 | 0.3525  | 0.01075 |
| <b>C6</b>  | 0.61247 | 0.52155 | 0.95683 |
| <b>C6</b>  | 0.56171 | 0.34585 | 0.91492 |
| <b>Zn1</b> | 0.95665 | 0.62494 | 0.51434 |
| <b>O1</b>  | 0.82727 | 0.54657 | 0.47023 |
| <b>O1</b>  | 0.89348 | 0.36306 | 0.46012 |
| <b>F1</b>  | 0.37205 | 0.42782 | 0.32928 |
| <b>O1</b>  | 0.50673 | 0.13746 | 0.07713 |
| <b>F1</b>  | 0.46629 | 0.05025 | 0.41668 |
| <b>C1</b>  | 0.40145 | 0.14365 | 0.41742 |
| <b>C1</b>  | 0.34397 | 0.3305  | 0.36135 |
| <b>O1</b>  | 0.44418 | 0.96289 | 0.10046 |
| <b>F1</b>  | 0.26139 | 0.28352 | 0.33018 |
| <b>C4</b>  | 0.72162 | 0.38953 | 0.43076 |
| <b>N1</b>  | 0.90512 | 0.79091 | 0.53369 |
| <b>F1</b>  | 0.30629 | 0.10066 | 0.40656 |
| <b>N3</b>  | 0.93281 | 0.96897 | 0.59302 |
| <b>C3A</b> | 0.39683 | 0.07653 | 0.28265 |
| <b>H2</b>  | 0.35406 | 0.02268 | 0.31372 |
| <b>C3A</b> | 0.62118 | 0.23076 | 0.38393 |
| <b>H2</b>  | 0.61741 | 0.14332 | 0.36262 |
| <b>F1</b>  | 0.40566 | 0.18849 | 0.47614 |
| <b>N3</b>  | 0.84701 | 0.97728 | 0.49205 |
| <b>F1</b>  | 0.31571 | 0.37089 | 0.41699 |
| <b>N2</b>  | 0.97832 | 0.78728 | 0.63415 |
| <b>H1</b>  | 0.99388 | 0.83217 | 0.67418 |
| <b>H1</b>  | 0.96992 | 0.69716 | 0.6349  |
| <b>C3</b>  | 0.53176 | 0.29523 | 0.39129 |
| <b>N2</b>  | 0.81065 | 0.80332 | 0.43983 |
| <b>H1</b>  | 0.76359 | 0.85343 | 0.41233 |
| <b>H1</b>  | 0.80039 | 0.71367 | 0.4411  |
| <b>C4</b>  | 0.4596  | 0.10392 | 0.17972 |
| <b>C3A</b> | 0.53912 | 0.40743 | 0.41871 |
| <b>H2</b>  | 0.47279 | 0.46021 | 0.42641 |
| <b>C4A</b> | 0.63293 | 0.4548  | 0.43769 |



|            |         |         |         |
|------------|---------|---------|---------|
| <b>H3</b>  | 0.63828 | 0.54306 | 0.45787 |
| <b>C4A</b> | 0.40685 | 0.03675 | 0.22197 |
| <b>H3</b>  | 0.37217 | 0.95946 | 0.20683 |
| <b>C3A</b> | 0.49172 | 0.25195 | 0.25963 |
| <b>H2</b>  | 0.52507 | 0.3364  | 0.27364 |
| <b>C4A</b> | 0.50141 | 0.21262 | 0.19916 |
| <b>H3</b>  | 0.54246 | 0.2659  | 0.16676 |
| <b>C2</b>  | 0.43091 | 0.2379  | 0.36801 |
| <b>C5</b>  | 0.82181 | 0.43717 | 0.45524 |
| <b>C4A</b> | 0.71446 | 0.27676 | 0.40351 |
| <b>H3</b>  | 0.78278 | 0.22521 | 0.3984  |
| <b>C5</b>  | 0.47127 | 0.0629  | 0.1143  |
| <b>C3</b>  | 0.44045 | 0.18424 | 0.30252 |
| <b>N4</b>  | 0.89327 | 0.14092 | 0.54548 |
| <b>H1</b>  | 0.86872 | 0.18987 | 0.50822 |
| <b>H1</b>  | 0.9316  | 0.18362 | 0.58063 |
| <b>C6</b>  | 0.85457 | 0.8595  | 0.48978 |
| <b>C6</b>  | 0.89167 | 0.02202 | 0.54327 |
| <b>C6</b>  | 0.93735 | 0.8515  | 0.58615 |
| <b>Zn1</b> | 0.45239 | 0.88385 | 0.01492 |
| <b>O1</b>  | 0.32239 | 0.96853 | 0.97968 |
| <b>O1</b>  | 0.3928  | 0.14268 | 0.96323 |
| <b>F1</b>  | 0.87204 | 0.07467 | 0.82987 |
| <b>O1</b>  | 0.01008 | 0.36403 | 0.57691 |
| <b>F1</b>  | 0.96591 | 0.45271 | 0.91657 |
| <b>C1</b>  | 0.90117 | 0.35927 | 0.91736 |
| <b>C1</b>  | 0.84437 | 0.1702  | 0.8634  |
| <b>O1</b>  | 0.94352 | 0.54245 | 0.59973 |
| <b>F1</b>  | 0.76047 | 0.21397 | 0.83313 |
| <b>C4</b>  | 0.21896 | 0.11872 | 0.93893 |
| <b>N1</b>  | 0.40404 | 0.71551 | 0.03326 |
| <b>F1</b>  | 0.80584 | 0.40238 | 0.90646 |
| <b>N3</b>  | 0.42812 | 0.53654 | 0.09239 |
| <b>C3A</b> | 0.8987  | 0.42431 | 0.7827  |
| <b>H2</b>  | 0.85729 | 0.47971 | 0.81399 |
| <b>C3A</b> | 0.11993 | 0.27401 | 0.88772 |
| <b>H2</b>  | 0.11657 | 0.36004 | 0.86479 |
| <b>F1</b>  | 0.90529 | 0.31468 | 0.97619 |
| <b>N3</b>  | 0.34396 | 0.53022 | 0.99077 |
| <b>F1</b>  | 0.8162  | 0.13164 | 0.91966 |
| <b>N2</b>  | 0.47818 | 0.71622 | 0.13364 |
| <b>H1</b>  | 0.49268 | 0.67013 | 0.17342 |
| <b>H1</b>  | 0.47086 | 0.80642 | 0.13501 |
| <b>C4A</b> | 0.03131 | 0.20845 | 0.89374 |
| <b>N2</b>  | 0.30922 | 0.70538 | 0.93925 |

|     |         |         |         |
|-----|---------|---------|---------|
| H1  | 0.26103 | 0.65615 | 0.91201 |
| H1  | 0.29785 | 0.79466 | 0.94158 |
| C4  | 0.95977 | 0.39552 | 0.67941 |
| C3A | 0.03803 | 0.09763 | 0.92336 |
| H2  | 0.97113 | 0.04399 | 0.92972 |
| C4A | 0.13089 | 0.05302 | 0.94513 |
| H3  | 0.13564 | 0.97251 | 0.96756 |
| C4A | 0.90835 | 0.46358 | 0.72186 |
| H3  | 0.87427 | 0.54755 | 0.70679 |
| C3A | 0.99184 | 0.24781 | 0.75979 |
| H2  | 0.02554 | 0.16316 | 0.77406 |
| C4A | 0.00165 | 0.28679 | 0.69919 |
| H3  | 0.04233 | 0.23309 | 0.66668 |
| C2  | 0.93054 | 0.26395 | 0.86869 |
| C5  | 0.31909 | 0.07087 | 0.96239 |
| C4A | 0.21245 | 0.23031 | 0.91035 |
| H3  | 0.28054 | 0.28231 | 0.90546 |
| C5  | 0.97163 | 0.43682 | 0.61379 |
| C3  | 0.94074 | 0.31589 | 0.80271 |
| N2  | 0.38399 | 0.35907 | 0.04564 |
| H1  | 0.36655 | 0.31099 | 0.00667 |
| H1  | 0.42741 | 0.31778 | 0.07918 |
| C6  | 0.35271 | 0.64797 | 0.98906 |
| C6  | 0.38649 | 0.47846 | 0.04259 |
| C6  | 0.43538 | 0.65381 | 0.08566 |
| Zn1 | 0.04715 | 0.38623 | 0.4849  |
| O1  | 0.17793 | 0.46573 | 0.52016 |
| O1  | 0.11079 | 0.64717 | 0.53674 |
| F1  | 0.62765 | 0.59008 | 0.67646 |
| O1  | 0.4893  | 0.865   | 0.9226  |
| F1  | 0.53336 | 0.95645 | 0.58299 |
| C1  | 0.59847 | 0.8636  | 0.58222 |
| C1  | 0.65731 | 0.68056 | 0.6399  |
| O1  | 0.5556  | 0.0377  | 0.89953 |
| F1  | 0.73925 | 0.72967 | 0.67003 |
| C4  | 0.28379 | 0.62027 | 0.56092 |
| N1  | 0.09809 | 0.21937 | 0.46598 |
| F1  | 0.69361 | 0.90582 | 0.5931  |
| N3  | 0.07213 | 0.04011 | 0.40736 |
| C3A | 0.60664 | 0.92446 | 0.71874 |
| H2  | 0.65361 | 0.97587 | 0.68886 |
| C3A | 0.38172 | 0.7776  | 0.61064 |
| H2  | 0.38459 | 0.86452 | 0.63265 |
| F1  | 0.59407 | 0.81772 | 0.52355 |
| N3  | 0.15748 | 0.03412 | 0.50843 |

|            |         |         |         |
|------------|---------|---------|---------|
| <b>F1</b>  | 0.68864 | 0.63501 | 0.58634 |
| <b>N2</b>  | 0.02248 | 0.21997 | 0.36601 |
| <b>H1</b>  | 0.00842 | 0.1743  | 0.32608 |
| <b>H1</b>  | 0.02925 | 0.31013 | 0.36468 |
| <b>C3</b>  | 0.47048 | 0.71183 | 0.60575 |
| <b>N2</b>  | 0.194   | 0.2095  | 0.55922 |
| <b>H1</b>  | 0.24035 | 0.16026 | 0.58765 |
| <b>H1</b>  | 0.2035  | 0.29909 | 0.55756 |
| <b>C4</b>  | 0.53923 | 0.89746 | 0.82039 |
| <b>C3A</b> | 0.46486 | 0.59975 | 0.57753 |
| <b>H2</b>  | 0.53165 | 0.54577 | 0.57232 |
| <b>C4A</b> | 0.37201 | 0.55429 | 0.55582 |
| <b>H3</b>  | 0.36791 | 0.46686 | 0.5343  |
| <b>C4A</b> | 0.59763 | 0.96161 | 0.77992 |
| <b>H3</b>  | 0.63748 | 0.03432 | 0.79702 |
| <b>C3A</b> | 0.49968 | 0.75699 | 0.7379  |
| <b>H2</b>  | 0.46184 | 0.67602 | 0.72207 |
| <b>C4A</b> | 0.4911  | 0.79363 | 0.79893 |
| <b>H3</b>  | 0.44682 | 0.74231 | 0.83059 |
| <b>C2</b>  | 0.56924 | 0.76992 | 0.63118 |
| <b>C5</b>  | 0.18347 | 0.57358 | 0.5375  |
| <b>C4A</b> | 0.2896  | 0.73291 | 0.58838 |
| <b>H3</b>  | 0.22123 | 0.78472 | 0.59265 |
| <b>C4</b>  | 0.52726 | 0.93841 | 0.88572 |
| <b>C3</b>  | 0.55665 | 0.82224 | 0.69669 |
| <b>N4</b>  | 0.11666 | 0.86883 | 0.45437 |
| <b>H1</b>  | 0.13562 | 0.82146 | 0.49335 |
| <b>H1</b>  | 0.0731  | 0.82626 | 0.42131 |
| <b>C6</b>  | 0.14947 | 0.15194 | 0.50998 |
| <b>C6</b>  | 0.11422 | 0.98832 | 0.45714 |
| <b>C6</b>  | 0.06561 | 0.1576  | 0.4139  |

**Table S4: Atomic co-ordinates for HbMOF2:**

|            |         |         |         |
|------------|---------|---------|---------|
| <b>Zn1</b> | 0.54668 | 0.11653 | 0.98511 |
| <b>O4</b>  | 0.67722 | 0.03608 | 0.02031 |
| <b>O1</b>  | 0.6073  | 0.86157 | 0.03636 |
| <b>F1</b>  | 0.12769 | 0.93082 | 0.17041 |
| <b>O1</b>  | 0.99971 | 0.64875 | 0.42308 |
| <b>F1</b>  | 0.03366 | 0.55326 | 0.08318 |
| <b>C5</b>  | 0.09862 | 0.64658 | 0.08245 |
| <b>C5</b>  | 0.15596 | 0.83367 | 0.13835 |

|            |         |         |         |
|------------|---------|---------|---------|
| <b>O1</b>  | 0.05611 | 0.46557 | 0.39935 |
| <b>F1</b>  | 0.23842 | 0.78656 | 0.16969 |
| <b>C3</b>  | 0.78099 | 0.88625 | 0.06106 |
| <b>N1</b>  | 0.59549 | 0.28461 | 0.96671 |
| <b>F1</b>  | 0.19376 | 0.60361 | 0.09327 |
| <b>N1</b>  | 0.5699  | 0.46294 | 0.90729 |
| <b>C3</b>  | 0.10339 | 0.58266 | 0.21709 |
| <b>H2</b>  | 0.14728 | 0.52959 | 0.18627 |
| <b>C3</b>  | 0.88024 | 0.73106 | 0.11193 |
| <b>H2</b>  | 0.88395 | 0.64506 | 0.1349  |
| <b>F1</b>  | 0.09427 | 0.69141 | 0.02361 |
| <b>N2</b>  | 0.65495 | 0.47049 | 0.00875 |
| <b>F1</b>  | 0.18465 | 0.874   | 0.08272 |
| <b>H1</b>  | 0.53712 | 0.29582 | 0.87643 |
| <b>C3</b>  | 0.96874 | 0.79706 | 0.10604 |
| <b>H4</b>  | 0.67434 | 0.32358 | 0.04598 |
| <b>C3</b>  | 0.04157 | 0.61178 | 0.31985 |
| <b>C3</b>  | 0.96196 | 0.90795 | 0.07666 |
| <b>H6</b>  | 0.02886 | 0.96176 | 0.07058 |
| <b>C3</b>  | 0.8689  | 0.95233 | 0.05498 |
| <b>H6</b>  | 0.86395 | 0.03288 | 0.03266 |
| <b>C3</b>  | 0.09429 | 0.54418 | 0.27801 |
| <b>H2</b>  | 0.12962 | 0.46159 | 0.29361 |
| <b>C3</b>  | 0.0049  | 0.75631 | 0.23885 |
| <b>H6</b>  | 0.96953 | 0.83958 | 0.22393 |
| <b>C9</b>  | 0.99655 | 0.71862 | 0.29974 |
| <b>H5</b>  | 0.95521 | 0.77122 | 0.3323  |
| <b>C4</b>  | 0.0691  | 0.74135 | 0.13126 |
| <b>C2</b>  | 0.68097 | 0.93388 | 0.03749 |
| <b>C3</b>  | 0.78763 | 0.77447 | 0.08946 |
| <b>H2</b>  | 0.71955 | 0.72231 | 0.0943  |
| <b>C2</b>  | 0.03181 | 0.57239 | 0.38559 |
| <b>C3</b>  | 0.05802 | 0.68887 | 0.19664 |
| <b>H1</b>  | 0.62002 | 0.61194 | 0.95906 |
| <b>C8</b>  | 0.64676 | 0.3525  | 0.01075 |
| <b>C1</b>  | 0.61247 | 0.52155 | 0.95683 |
| <b>C1</b>  | 0.56171 | 0.34585 | 0.91492 |
| <b>Zn1</b> | 0.95665 | 0.62494 | 0.51434 |
| <b>O1</b>  | 0.82727 | 0.54657 | 0.47023 |
| <b>O2</b>  | 0.89348 | 0.36306 | 0.46012 |
| <b>F1</b>  | 0.37205 | 0.42782 | 0.32928 |
| <b>O3</b>  | 0.50673 | 0.13746 | 0.07713 |
| <b>F1</b>  | 0.46629 | 0.05025 | 0.41668 |
| <b>C5</b>  | 0.40145 | 0.14365 | 0.41742 |
| <b>C5</b>  | 0.34397 | 0.3305  | 0.36135 |

|            |         |         |         |
|------------|---------|---------|---------|
| <b>O1</b>  | 0.44418 | 0.96289 | 0.10046 |
| <b>F1</b>  | 0.26139 | 0.28352 | 0.33018 |
| <b>C3</b>  | 0.72162 | 0.38953 | 0.43076 |
| <b>N1</b>  | 0.90512 | 0.79091 | 0.53369 |
| <b>F1</b>  | 0.30629 | 0.10066 | 0.40656 |
| <b>N1</b>  | 0.93281 | 0.96897 | 0.59302 |
| <b>C6</b>  | 0.39683 | 0.07653 | 0.28265 |
| <b>H3</b>  | 0.35406 | 0.02268 | 0.31372 |
| <b>C3</b>  | 0.62118 | 0.23076 | 0.38393 |
| <b>H2</b>  | 0.61741 | 0.14332 | 0.36262 |
| <b>F1</b>  | 0.40566 | 0.18849 | 0.47614 |
| <b>N1</b>  | 0.84701 | 0.97728 | 0.49205 |
| <b>F1</b>  | 0.31571 | 0.37089 | 0.41699 |
| <b>H1</b>  | 0.98043 | 0.80112 | 0.62429 |
| <b>C3</b>  | 0.53176 | 0.29523 | 0.39129 |
| <b>H1</b>  | 0.82273 | 0.82119 | 0.4547  |
| <b>C6</b>  | 0.4596  | 0.10392 | 0.17972 |
| <b>C3</b>  | 0.53912 | 0.40743 | 0.41871 |
| <b>H2</b>  | 0.47279 | 0.46021 | 0.42641 |
| <b>C3</b>  | 0.63293 | 0.4548  | 0.43769 |
| <b>H2</b>  | 0.63828 | 0.54306 | 0.45787 |
| <b>C6</b>  | 0.40685 | 0.03675 | 0.22197 |
| <b>H6</b>  | 0.37217 | 0.95946 | 0.20683 |
| <b>C6</b>  | 0.49172 | 0.25195 | 0.25963 |
| <b>H3</b>  | 0.52507 | 0.3364  | 0.27364 |
| <b>C6</b>  | 0.50141 | 0.21262 | 0.19916 |
| <b>H3</b>  | 0.54246 | 0.2659  | 0.16676 |
| <b>C4</b>  | 0.43091 | 0.2379  | 0.36801 |
| <b>C2</b>  | 0.82181 | 0.43717 | 0.45524 |
| <b>C3</b>  | 0.71446 | 0.27676 | 0.40351 |
| <b>H2</b>  | 0.78278 | 0.22521 | 0.3984  |
| <b>C7</b>  | 0.47127 | 0.0629  | 0.1143  |
| <b>C6</b>  | 0.44045 | 0.18424 | 0.30252 |
| <b>H5</b>  | 0.89404 | 0.11814 | 0.55098 |
| <b>C1</b>  | 0.85457 | 0.8595  | 0.48978 |
| <b>C9</b>  | 0.89167 | 0.02202 | 0.54327 |
| <b>C1</b>  | 0.93735 | 0.8515  | 0.58615 |
| <b>Zn1</b> | 0.45239 | 0.88385 | 0.01492 |
| <b>O4</b>  | 0.32239 | 0.96853 | 0.97968 |
| <b>O1</b>  | 0.3928  | 0.14268 | 0.96323 |
| <b>F1</b>  | 0.87204 | 0.07467 | 0.82987 |
| <b>O1</b>  | 0.01008 | 0.36403 | 0.57691 |
| <b>F1</b>  | 0.96591 | 0.45271 | 0.91657 |
| <b>C5</b>  | 0.90117 | 0.35927 | 0.91736 |
| <b>C5</b>  | 0.84437 | 0.1702  | 0.8634  |

|     |         |         |         |
|-----|---------|---------|---------|
| O1  | 0.94352 | 0.54245 | 0.59973 |
| F1  | 0.76047 | 0.21397 | 0.83313 |
| C3  | 0.21896 | 0.11872 | 0.93893 |
| N1  | 0.40404 | 0.71551 | 0.03326 |
| F1  | 0.80584 | 0.40238 | 0.90646 |
| N1  | 0.42812 | 0.53654 | 0.09239 |
| C3  | 0.8987  | 0.42431 | 0.7827  |
| H2  | 0.85729 | 0.47971 | 0.81399 |
| C3  | 0.11993 | 0.27401 | 0.88772 |
| H2  | 0.11657 | 0.36004 | 0.86479 |
| F1  | 0.90529 | 0.31468 | 0.97619 |
| N2  | 0.34396 | 0.53022 | 0.99077 |
| F1  | 0.8162  | 0.13164 | 0.91966 |
| H1  | 0.45986 | 0.69155 | 0.12715 |
| C3  | 0.03131 | 0.20845 | 0.89374 |
| H4  | 0.33327 | 0.67781 | 0.9554  |
| C3  | 0.95977 | 0.39552 | 0.67941 |
| C3  | 0.03803 | 0.09763 | 0.92336 |
| H6  | 0.97113 | 0.04399 | 0.92972 |
| C3  | 0.13089 | 0.05302 | 0.94513 |
| H6  | 0.13564 | 0.97251 | 0.96756 |
| C3  | 0.90835 | 0.46358 | 0.72186 |
| H2  | 0.87427 | 0.54755 | 0.70679 |
| C3  | 0.99184 | 0.24781 | 0.75979 |
| H6  | 0.02554 | 0.16316 | 0.77406 |
| C9  | 0.00165 | 0.28679 | 0.69919 |
| H5  | 0.04233 | 0.23309 | 0.66668 |
| C4  | 0.93054 | 0.26395 | 0.86869 |
| C2  | 0.31909 | 0.07087 | 0.96239 |
| C3  | 0.21245 | 0.23031 | 0.91035 |
| H2  | 0.28054 | 0.28231 | 0.90546 |
| C2  | 0.97163 | 0.43682 | 0.61379 |
| C3  | 0.94074 | 0.31589 | 0.80271 |
| H1  | 0.39351 | 0.3764  | 0.03891 |
| C8  | 0.35271 | 0.64797 | 0.98906 |
| C1  | 0.38649 | 0.47846 | 0.04259 |
| C1  | 0.43538 | 0.65381 | 0.08566 |
| Zn1 | 0.04715 | 0.38623 | 0.4849  |
| O1  | 0.17793 | 0.46573 | 0.52016 |
| O2  | 0.11079 | 0.64717 | 0.53674 |
| F1  | 0.62765 | 0.59008 | 0.67646 |
| O3  | 0.4893  | 0.865   | 0.9226  |
| F1  | 0.53336 | 0.95645 | 0.58299 |
| C5  | 0.59847 | 0.8636  | 0.58222 |
| C5  | 0.65731 | 0.68056 | 0.6399  |

|           |         |         |         |
|-----------|---------|---------|---------|
| <b>O1</b> | 0.5556  | 0.0377  | 0.89953 |
| <b>F1</b> | 0.73925 | 0.72967 | 0.67003 |
| <b>C3</b> | 0.28379 | 0.62027 | 0.56092 |
| <b>N1</b> | 0.09809 | 0.21937 | 0.46598 |
| <b>F1</b> | 0.69361 | 0.90582 | 0.5931  |
| <b>N1</b> | 0.07213 | 0.04011 | 0.40736 |
| <b>C6</b> | 0.60664 | 0.92446 | 0.71874 |
| <b>H3</b> | 0.65361 | 0.97587 | 0.68886 |
| <b>C3</b> | 0.38172 | 0.7776  | 0.61064 |
| <b>H2</b> | 0.38459 | 0.86452 | 0.63265 |
| <b>F1</b> | 0.59407 | 0.81772 | 0.52355 |
| <b>N1</b> | 0.15748 | 0.03412 | 0.50843 |
| <b>F1</b> | 0.68864 | 0.63501 | 0.58634 |
| <b>H1</b> | 0.04268 | 0.20546 | 0.38481 |
| <b>C3</b> | 0.47048 | 0.71183 | 0.60575 |
| <b>H1</b> | 0.17895 | 0.1821  | 0.54917 |
| <b>C6</b> | 0.53923 | 0.89746 | 0.82039 |
| <b>C3</b> | 0.46486 | 0.59975 | 0.57753 |
| <b>H2</b> | 0.53165 | 0.54577 | 0.57232 |
| <b>C3</b> | 0.37201 | 0.55429 | 0.55582 |
| <b>H2</b> | 0.36791 | 0.46686 | 0.5343  |
| <b>C6</b> | 0.59763 | 0.96161 | 0.77992 |
| <b>H6</b> | 0.63748 | 0.03432 | 0.79702 |
| <b>C6</b> | 0.49968 | 0.75699 | 0.7379  |
| <b>H3</b> | 0.46184 | 0.67602 | 0.72207 |
| <b>C6</b> | 0.4911  | 0.79363 | 0.79893 |
| <b>H3</b> | 0.44682 | 0.74231 | 0.83059 |
| <b>C4</b> | 0.56924 | 0.76992 | 0.63118 |
| <b>C2</b> | 0.18347 | 0.57358 | 0.5375  |
| <b>C3</b> | 0.2896  | 0.73291 | 0.58838 |
| <b>H2</b> | 0.22123 | 0.78472 | 0.59265 |
| <b>C7</b> | 0.52726 | 0.93841 | 0.88572 |
| <b>C6</b> | 0.55665 | 0.82224 | 0.69669 |
| <b>H5</b> | 0.11565 | 0.90062 | 0.4555  |
| <b>C1</b> | 0.14947 | 0.15194 | 0.50998 |
| <b>C9</b> | 0.11422 | 0.98832 | 0.45714 |
| <b>C1</b> | 0.06561 | 0.1576  | 0.4139  |

**Table S5: Atomic coordinates for HbMOF3:**

|            |         |         |         |
|------------|---------|---------|---------|
| <b>Zn1</b> | 0.55158 | 0.12345 | 0.98822 |
| <b>O1</b>  | 0.67997 | 0.03756 | 1.02233 |

|           |         |          |         |
|-----------|---------|----------|---------|
| <b>O1</b> | 0.60831 | -0.1448  | 1.04083 |
| <b>H3</b> | 1.13659 | -0.08303 | 1.17397 |
| <b>O2</b> | 0.9942  | -0.37014 | 1.42909 |
| <b>H3</b> | 1.0451  | -0.45481 | 1.08767 |
| <b>C5</b> | 1.10541 | -0.36994 | 1.08628 |
| <b>C5</b> | 1.16534 | -0.17013 | 1.1434  |
| <b>O2</b> | 1.06473 | -0.55035 | 1.40565 |
| <b>H3</b> | 1.23941 | -0.21887 | 1.17133 |
| <b>C3</b> | 0.78387 | -0.12132 | 1.06306 |
| <b>N1</b> | 0.60118 | 0.29385  | 0.96926 |
| <b>H3</b> | 1.19287 | -0.40794 | 1.09827 |
| <b>N1</b> | 0.57542 | 0.47546  | 0.90888 |
| <b>C7</b> | 1.10199 | -0.42779 | 1.2231  |
| <b>H4</b> | 1.14352 | -0.4844  | 1.19177 |
| <b>C3</b> | 0.88616 | -0.27508 | 1.1133  |
| <b>H2</b> | 0.88871 | -0.36347 | 1.13551 |
| <b>H3</b> | 1.10061 | -0.32342 | 1.03331 |
| <b>N1</b> | 0.65812 | 0.48487  | 1.01171 |
| <b>H3</b> | 1.19082 | -0.13619 | 1.09048 |
| <b>N2</b> | 0.53299 | 0.29226  | 0.86962 |
| <b>H1</b> | 0.50776 | 0.33254  | 0.8295  |
| <b>H1</b> | 0.52726 | 0.20108  | 0.87172 |
| <b>C3</b> | 0.97457 | -0.21162 | 1.11046 |
| <b>N2</b> | 0.69562 | 0.30923  | 1.0608  |
| <b>H1</b> | 0.73331 | 0.35633  | 1.0952  |
| <b>H1</b> | 0.69411 | 0.21834  | 1.0655  |
| <b>C7</b> | 1.04269 | -0.40234 | 1.32627 |
| <b>C3</b> | 0.96394 | -0.10186 | 1.08205 |
| <b>H2</b> | 1.03097 | -0.0462  | 1.07661 |
| <b>C3</b> | 0.87168 | -0.05715 | 1.05971 |
| <b>H2</b> | 0.86844 | 0.03241  | 1.03874 |
| <b>C7</b> | 1.0921  | -0.46765 | 1.28333 |
| <b>H4</b> | 1.12486 | -0.55425 | 1.29728 |
| <b>C7</b> | 1.01183 | -0.25753 | 1.24467 |
| <b>H4</b> | 0.97689 | -0.17236 | 1.23021 |
| <b>C7</b> | 1.00288 | -0.29594 | 1.30498 |
| <b>H4</b> | 0.96246 | -0.23872 | 1.33669 |
| <b>C4</b> | 1.07538 | -0.2682  | 1.13592 |
| <b>C2</b> | 0.68346 | -0.0723  | 1.04031 |
| <b>C3</b> | 0.79437 | -0.23226 | 1.08978 |
| <b>H2</b> | 0.72822 | -0.29015 | 1.09296 |
| <b>C6</b> | 1.0331  | -0.44413 | 1.39166 |
| <b>C7</b> | 1.06229 | -0.32128 | 1.20145 |
| <b>N2</b> | 0.61388 | 0.65326  | 0.95659 |
| <b>H1</b> | 0.64351 | 0.70737  | 0.99157 |



|            |          |          |          |
|------------|----------|----------|----------|
| <b>H1</b>  | 0.58244  | 0.69966  | 0.91921  |
| <b>C1</b>  | 0.64952  | 0.36706  | 1.01148  |
| <b>C1</b>  | 0.61489  | 0.53309  | 0.95937  |
| <b>C1</b>  | 0.57196  | 0.35866  | 0.91799  |
| <b>Zn1</b> | -0.04847 | 0.63653  | -0.48626 |
| <b>O1</b>  | -0.17686 | 0.55066  | -0.52039 |
| <b>O1</b>  | -0.1052  | 0.36828  | -0.53888 |
| <b>H3</b>  | -0.63349 | 0.43005  | -0.672   |
| <b>O1</b>  | -0.49106 | 0.14294  | -0.92712 |
| <b>H3</b>  | -0.54201 | 0.05828  | -0.58571 |
| <b>C5</b>  | -0.60229 | 0.14313  | -0.5843  |
| <b>C5</b>  | -0.66223 | 0.34295  | -0.64144 |
| <b>O1</b>  | -0.5616  | -0.03726 | -0.90368 |
| <b>H3</b>  | -0.73632 | 0.29421  | -0.66937 |
| <b>C3</b>  | -0.28078 | 0.39174  | -0.56106 |
| <b>N1</b>  | -0.09808 | 0.80695  | -0.4673  |
| <b>H3</b>  | -0.68978 | 0.10515  | -0.59631 |
| <b>N1</b>  | -0.0723  | 0.98854  | -0.40692 |
| <b>C3</b>  | -0.5989  | 0.0853   | -0.72114 |
| <b>H2</b>  | -0.64043 | 0.02869  | -0.68981 |
| <b>C3</b>  | -0.38307 | 0.23801  | -0.61134 |
| <b>H2</b>  | -0.38562 | 0.14962  | -0.63355 |
| <b>H3</b>  | -0.59751 | 0.18966  | -0.53135 |
| <b>N1</b>  | -0.15503 | 0.99795  | -0.50973 |
| <b>H3</b>  | -0.68773 | 0.3769   | -0.58851 |
| <b>N2</b>  | -0.0299  | 0.80534  | -0.36765 |
| <b>H1</b>  | -0.00466 | 0.84562  | -0.32753 |
| <b>H1</b>  | -0.02416 | 0.71417  | -0.36975 |
| <b>C3</b>  | -0.47149 | 0.30146  | -0.60848 |
| <b>N2</b>  | -0.19253 | 0.82232  | -0.55883 |
| <b>H1</b>  | -0.23021 | 0.86941  | -0.59323 |
| <b>H1</b>  | -0.19101 | 0.73144  | -0.56354 |
| <b>C3</b>  | -0.53962 | 0.11075  | -0.82432 |
| <b>C3</b>  | -0.46084 | 0.41124  | -0.5801  |
| <b>H2</b>  | -0.52788 | 0.4669   | -0.57465 |
| <b>C3</b>  | -0.36857 | 0.45594  | -0.55776 |
| <b>H2</b>  | -0.36535 | 0.5455   | -0.53678 |
| <b>C3</b>  | -0.58899 | 0.04543  | -0.78136 |
| <b>H2</b>  | -0.62176 | -0.04116 | -0.79531 |
| <b>C3</b>  | -0.50868 | 0.25553  | -0.74269 |
| <b>H2</b>  | -0.47379 | 0.34072  | -0.72825 |
| <b>C3</b>  | -0.49977 | 0.21713  | -0.80301 |
| <b>H2</b>  | -0.45939 | 0.27438  | -0.83473 |
| <b>C4</b>  | -0.57228 | 0.24491  | -0.63395 |
| <b>C2</b>  | -0.18038 | 0.44079  | -0.5383  |

|            |          |          |          |
|------------|----------|----------|----------|
| <b>C3</b>  | -0.29127 | 0.28083  | -0.58782 |
| <b>H2</b>  | -0.22512 | 0.22293  | -0.59099 |
| <b>C2</b>  | -0.53007 | 0.06894  | -0.8897  |
| <b>C3</b>  | -0.5592  | 0.1918   | -0.69949 |
| <b>N2</b>  | -0.11078 | 1.16635  | -0.45462 |
| <b>H1</b>  | -0.14042 | 1.22045  | -0.48961 |
| <b>H1</b>  | -0.07933 | 1.21275  | -0.41724 |
| <b>C1</b>  | -0.14644 | 0.88013  | -0.5095  |
| <b>C1</b>  | -0.1118  | 1.04616  | -0.45742 |
| <b>C1</b>  | -0.06887 | 0.87174  | -0.41602 |
| <b>Zn1</b> | -0.55156 | -0.12346 | -0.98823 |
| <b>O1</b>  | -0.67997 | -0.03753 | -1.02234 |
| <b>O1</b>  | -0.60829 | 0.14479  | -1.04085 |
| <b>H3</b>  | -1.13659 | 0.08303  | -1.17397 |
| <b>O2</b>  | -0.99419 | 0.37013  | -1.42909 |
| <b>H3</b>  | -1.0451  | 0.45481  | -1.08767 |
| <b>C5</b>  | -1.10539 | 0.36995  | -1.08627 |
| <b>C5</b>  | -1.16534 | 0.17013  | -1.1434  |
| <b>O2</b>  | -1.06471 | 0.55035  | -1.40564 |
| <b>H3</b>  | -1.23942 | 0.21887  | -1.17133 |
| <b>C3</b>  | -0.78391 | 0.12134  | -1.06303 |
| <b>N1</b>  | -0.60119 | -0.29387 | -0.96926 |
| <b>H3</b>  | -1.19289 | 0.40795  | -1.09828 |
| <b>N1</b>  | -0.57542 | -0.47546 | -0.90888 |
| <b>C7</b>  | -1.10201 | 0.42778  | -1.22311 |
| <b>H4</b>  | -1.14352 | 0.48439  | -1.19177 |
| <b>C3</b>  | -0.88616 | 0.27506  | -1.11331 |
| <b>H2</b>  | -0.88871 | 0.36347  | -1.1355  |
| <b>H3</b>  | -1.1006  | 0.32342  | -1.03331 |
| <b>N1</b>  | -0.65812 | -0.48485 | -1.01171 |
| <b>H3</b>  | -1.19082 | 0.13618  | -1.09048 |
| <b>N2</b>  | -0.533   | -0.29227 | -0.86963 |
| <b>H1</b>  | -0.50776 | -0.33254 | -0.8295  |
| <b>H1</b>  | -0.52727 | -0.20109 | -0.87171 |
| <b>C3</b>  | -0.9746  | 0.21161  | -1.11044 |
| <b>N2</b>  | -0.69563 | -0.30922 | -1.0608  |
| <b>H1</b>  | -0.7333  | -0.35633 | -1.0952  |
| <b>H1</b>  | -0.69411 | -0.21836 | -1.0655  |
| <b>C7</b>  | -1.04272 | 0.40235  | -1.32628 |
| <b>C3</b>  | -0.96393 | 0.10187  | -1.08206 |
| <b>H2</b>  | -1.03097 | 0.04619  | -1.07662 |
| <b>C3</b>  | -0.87169 | 0.05715  | -1.05972 |
| <b>H2</b>  | -0.86844 | -0.03241 | -1.03874 |
| <b>C7</b>  | -1.09208 | 0.46765  | -1.28333 |
| <b>H4</b>  | -1.12486 | 0.55425  | -1.29728 |

|     |          |          |          |
|-----|----------|----------|----------|
| C7  | -1.01179 | 0.25755  | -1.24465 |
| H4  | -0.97688 | 0.17236  | -1.23021 |
| C7  | -1.00288 | 0.29595  | -1.30497 |
| H4  | -0.96247 | 0.23871  | -1.33669 |
| C4  | -1.07536 | 0.26818  | -1.1359  |
| C2  | -0.68345 | 0.07225  | -1.04027 |
| C3  | -0.79436 | 0.23226  | -1.08981 |
| H2  | -0.72822 | 0.29016  | -1.09296 |
| C6  | -1.03314 | 0.44416  | -1.39167 |
| C7  | -1.06231 | 0.32128  | -1.20145 |
| N2  | -0.61388 | -0.65326 | -0.95659 |
| H1  | -0.64351 | -0.70737 | -0.99157 |
| H1  | -0.58243 | -0.69967 | -0.9192  |
| C1  | -0.64953 | -0.36706 | -1.01147 |
| C1  | -0.61487 | -0.53307 | -0.95938 |
| C1  | -0.57198 | -0.35862 | -0.91799 |
| Zn1 | 1.05466  | 0.38966  | 1.49019  |
| O1  | 1.18307  | 0.47554  | 1.52427  |
| O1  | 1.1114   | 0.65789  | 1.54279  |
| H3  | 1.63968  | 0.59612  | 1.67593  |
| O2  | 1.49728  | 0.88324  | 1.93106  |
| H3  | 1.5482   | 0.96789  | 1.58964  |
| C5  | 1.60851  | 0.88304  | 1.58824  |
| C5  | 1.66843  | 0.68322  | 1.64537  |
| O2  | 1.56781  | 1.06345  | 1.90761  |
| H3  | 1.74251  | 0.73195  | 1.6733   |
| C3  | 1.28696  | 0.63438  | 1.56502  |
| N1  | 1.10426  | 0.2192   | 1.47123  |
| H3  | 1.69596  | 0.92102  | 1.60024  |
| N1  | 1.07852  | 0.03763  | 1.41085  |
| C7  | 1.60509  | 0.94087  | 1.72507  |
| H4  | 1.64661  | 0.99748  | 1.69374  |
| C3  | 1.38925  | 0.78817  | 1.61528  |
| H2  | 1.3918   | 0.87656  | 1.63748  |
| H3  | 1.6037   | 0.8365   | 1.53528  |
| N1  | 1.16123  | 0.02821  | 1.51366  |
| H3  | 1.69391  | 0.64928  | 1.59245  |
| N2  | 1.03609  | 0.22082  | 1.37159  |
| H1  | 1.01085  | 0.18055  | 1.33147  |
| H1  | 1.03036  | 0.312    | 1.37368  |
| C3  | 1.47769  | 0.7247   | 1.61239  |
| N2  | 1.19872  | 0.20385  | 1.56277  |
| H1  | 1.23641  | 0.15676  | 1.59717  |
| H1  | 1.1972   | 0.29474  | 1.56747  |
| C7  | 1.5458   | 0.91542  | 1.82825  |

|           |         |          |         |
|-----------|---------|----------|---------|
| <b>C3</b> | 1.46705 | 0.61497  | 1.58401 |
| <b>H2</b> | 1.53407 | 0.55927  | 1.57859 |
| <b>C3</b> | 1.37476 | 0.57025  | 1.5617  |
| <b>H2</b> | 1.37153 | 0.48065  | 1.54073 |
| <b>C7</b> | 1.59518 | 0.98074  | 1.7853  |
| <b>H4</b> | 1.62796 | 1.06733  | 1.79924 |
| <b>C7</b> | 1.5149  | 0.77061  | 1.74662 |
| <b>H4</b> | 1.47998 | 0.68545  | 1.73218 |
| <b>C7</b> | 1.506   | 0.80903  | 1.80695 |
| <b>H4</b> | 1.46558 | 0.75179  | 1.83866 |
| <b>C4</b> | 1.57846 | 0.78131  | 1.63789 |
| <b>C2</b> | 1.18657 | 0.58536  | 1.54229 |
| <b>C3</b> | 1.29746 | 0.74536  | 1.59174 |
| <b>H2</b> | 1.23132 | 0.80324  | 1.59493 |
| <b>C6</b> | 1.53622 | 0.95719  | 1.89363 |
| <b>C7</b> | 1.5654  | 0.83435  | 1.70341 |
| <b>N2</b> | 1.11696 | -0.14017 | 1.45856 |
| <b>H1</b> | 1.14661 | -0.19429 | 1.49353 |
| <b>H1</b> | 1.08553 | -0.18658 | 1.42117 |
| <b>C1</b> | 1.15262 | 0.14604  | 1.51344 |
| <b>C1</b> | 1.11801 | -0.02    | 1.46135 |
| <b>C1</b> | 1.07506 | 0.15443  | 1.41994 |

**Table S6: Atomic coordinates of HbMOF4:**

|            |         |         |         |
|------------|---------|---------|---------|
| <b>Zn1</b> | 0.54668 | 0.11653 | 0.98511 |
| <b>O3</b>  | 0.67722 | 0.03608 | 0.02031 |
| <b>O1</b>  | 0.6073  | 0.86157 | 0.03636 |
| <b>H3</b>  | 0.12483 | 0.91631 | 0.15382 |
| <b>O1B</b> | 0.99971 | 0.64875 | 0.42308 |
| <b>H3</b>  | 0.04338 | 0.5803  | 0.08027 |
| <b>C3A</b> | 0.09862 | 0.64658 | 0.08245 |
| <b>C3A</b> | 0.15596 | 0.83367 | 0.13835 |
| <b>O1</b>  | 0.05611 | 0.46557 | 0.39935 |
| <b>H3</b>  | 0.20647 | 0.77904 | 0.16603 |
| <b>C2A</b> | 0.78099 | 0.88625 | 0.06106 |
| <b>N1</b>  | 0.59549 | 0.28461 | 0.96671 |
| <b>H3</b>  | 0.1751  | 0.6216  | 0.09751 |
| <b>N1</b>  | 0.5699  | 0.46294 | 0.90729 |
| <b>C2A</b> | 0.10339 | 0.58266 | 0.21709 |
| <b>H2</b>  | 0.14728 | 0.52959 | 0.18627 |
| <b>C2A</b> | 0.88024 | 0.73106 | 0.11193 |

|     |         |         |         |
|-----|---------|---------|---------|
| H2  | 0.88395 | 0.64506 | 0.1349  |
| H3  | 0.08793 | 0.66832 | 0.03427 |
| N2  | 0.65495 | 0.47049 | 0.00875 |
| H3  | 0.17281 | 0.88552 | 0.09759 |
| H1  | 0.53712 | 0.29582 | 0.87643 |
| C2A | 0.96874 | 0.79706 | 0.10604 |
| H4  | 0.67434 | 0.32358 | 0.04598 |
| C2A | 0.04157 | 0.61178 | 0.31985 |
| C2A | 0.96196 | 0.90795 | 0.07666 |
| H6  | 0.02886 | 0.96176 | 0.07058 |
| C2A | 0.8689  | 0.95233 | 0.05498 |
| H6  | 0.86395 | 0.03288 | 0.03266 |
| C2A | 0.09429 | 0.54418 | 0.27801 |
| H2  | 0.12962 | 0.46159 | 0.29361 |
| C2A | 0.0049  | 0.75631 | 0.23885 |
| H6  | 0.96953 | 0.83958 | 0.22393 |
| C6  | 0.99655 | 0.71862 | 0.29974 |
| H5  | 0.95521 | 0.77122 | 0.3323  |
| C3  | 0.0691  | 0.74135 | 0.13126 |
| C2  | 0.68097 | 0.93388 | 0.03749 |
| C2A | 0.78763 | 0.77447 | 0.08946 |
| H2  | 0.71955 | 0.72231 | 0.0943  |
| C2  | 0.03181 | 0.57239 | 0.38559 |
| C2A | 0.05802 | 0.68887 | 0.19664 |
| H1  | 0.62002 | 0.61194 | 0.95906 |
| C5  | 0.64676 | 0.3525  | 0.01075 |
| C1  | 0.61247 | 0.52155 | 0.95683 |
| C1  | 0.56171 | 0.34585 | 0.91492 |
| Zn1 | 0.95665 | 0.62494 | 0.51434 |
| O1  | 0.82727 | 0.54657 | 0.47023 |
| O1A | 0.89348 | 0.36306 | 0.46012 |
| H3  | 0.36407 | 0.39595 | 0.33395 |
| O2  | 0.50673 | 0.13746 | 0.07713 |
| H3  | 0.43957 | 0.05922 | 0.41127 |
| C3A | 0.40145 | 0.14365 | 0.41742 |
| C3A | 0.34397 | 0.3305  | 0.36135 |
| O1B | 0.44418 | 0.96289 | 0.10046 |
| H3  | 0.27793 | 0.28152 | 0.34468 |
| C2A | 0.72162 | 0.38953 | 0.43076 |
| N1  | 0.90512 | 0.79091 | 0.53369 |
| H3  | 0.33411 | 0.09997 | 0.39779 |
| N1  | 0.93281 | 0.96897 | 0.59302 |
| C3B | 0.39683 | 0.07653 | 0.28265 |
| H3A | 0.35406 | 0.02268 | 0.31372 |
| C2A | 0.62118 | 0.23076 | 0.38393 |

|     |         |         |         |
|-----|---------|---------|---------|
| H2  | 0.61741 | 0.14332 | 0.36262 |
| H3  | 0.41358 | 0.19723 | 0.45876 |
| N1  | 0.84701 | 0.97728 | 0.49205 |
| H3  | 0.31341 | 0.36598 | 0.40346 |
| H1  | 0.98043 | 0.80112 | 0.62429 |
| C2A | 0.53176 | 0.29523 | 0.39129 |
| H1  | 0.82273 | 0.82119 | 0.4547  |
| C3B | 0.4596  | 0.10392 | 0.17972 |
| C2A | 0.53912 | 0.40743 | 0.41871 |
| H2  | 0.47279 | 0.46021 | 0.42641 |
| C2A | 0.63293 | 0.4548  | 0.43769 |
| H2  | 0.63828 | 0.54306 | 0.45787 |
| C3B | 0.40685 | 0.03675 | 0.22197 |
| H6  | 0.37217 | 0.95946 | 0.20683 |
| C3B | 0.49172 | 0.25195 | 0.25963 |
| H3A | 0.52507 | 0.3364  | 0.27364 |
| C3B | 0.50141 | 0.21262 | 0.19916 |
| H3A | 0.54246 | 0.2659  | 0.16676 |
| C3  | 0.43091 | 0.2379  | 0.36801 |
| C2  | 0.82181 | 0.43717 | 0.45524 |
| C2A | 0.71446 | 0.27676 | 0.40351 |
| H2  | 0.78278 | 0.22521 | 0.3984  |
| C4  | 0.47127 | 0.0629  | 0.1143  |
| C3B | 0.44045 | 0.18424 | 0.30252 |
| H5  | 0.89404 | 0.11814 | 0.55098 |
| C1  | 0.85457 | 0.8595  | 0.48978 |
| C6  | 0.89167 | 0.02202 | 0.54327 |
| C1  | 0.93735 | 0.8515  | 0.58615 |
| Zn1 | 0.45239 | 0.88385 | 0.01492 |
| O3  | 0.32239 | 0.96853 | 0.97968 |
| O1  | 0.3928  | 0.14268 | 0.96323 |
| H3  | 0.87286 | 0.09301 | 0.83974 |
| O1B | 0.01008 | 0.36403 | 0.57691 |
| H3  | 0.95699 | 0.42959 | 0.92527 |
| C3A | 0.90117 | 0.35927 | 0.91736 |
| C3A | 0.84437 | 0.1702  | 0.8634  |
| O1  | 0.94352 | 0.54245 | 0.59973 |
| H3  | 0.78275 | 0.21541 | 0.83811 |
| C2A | 0.21896 | 0.11872 | 0.93893 |
| N1  | 0.40404 | 0.71551 | 0.03326 |
| H3  | 0.82547 | 0.39379 | 0.90568 |
| N1  | 0.42812 | 0.53654 | 0.09239 |
| C2A | 0.8987  | 0.42431 | 0.7827  |
| H2  | 0.85729 | 0.47971 | 0.81399 |
| C2A | 0.11993 | 0.27401 | 0.88772 |

|     |         |         |         |
|-----|---------|---------|---------|
| H2  | 0.11657 | 0.36004 | 0.86479 |
| H3  | 0.91257 | 0.3406  | 0.96638 |
| N2  | 0.34396 | 0.53022 | 0.99077 |
| H3  | 0.82207 | 0.12858 | 0.90623 |
| H1  | 0.45986 | 0.69155 | 0.12715 |
| C2A | 0.03131 | 0.20845 | 0.89374 |
| H4  | 0.33327 | 0.67781 | 0.9554  |
| C2A | 0.95977 | 0.39552 | 0.67941 |
| C2A | 0.03803 | 0.09763 | 0.92336 |
| H6  | 0.97113 | 0.04399 | 0.92972 |
| C2A | 0.13089 | 0.05302 | 0.94513 |
| H6  | 0.13564 | 0.97251 | 0.96756 |
| C2A | 0.90835 | 0.46358 | 0.72186 |
| H2  | 0.87427 | 0.54755 | 0.70679 |
| C2A | 0.99184 | 0.24781 | 0.75979 |
| H6  | 0.02554 | 0.16316 | 0.77406 |
| C6  | 0.00165 | 0.28679 | 0.69919 |
| H5  | 0.04233 | 0.23309 | 0.66668 |
| C3  | 0.93054 | 0.26395 | 0.86869 |
| C2  | 0.31909 | 0.07087 | 0.96239 |
| C2A | 0.21245 | 0.23031 | 0.91035 |
| H2  | 0.28054 | 0.28231 | 0.90546 |
| C2  | 0.97163 | 0.43682 | 0.61379 |
| C2A | 0.94074 | 0.31589 | 0.80271 |
| H1  | 0.39351 | 0.3764  | 0.03891 |
| C5  | 0.35271 | 0.64797 | 0.98906 |
| C1  | 0.38649 | 0.47846 | 0.04259 |
| C1  | 0.43538 | 0.65381 | 0.08566 |
| Zn1 | 0.04715 | 0.38623 | 0.4849  |
| O1  | 0.17793 | 0.46573 | 0.52016 |
| O1A | 0.11079 | 0.64717 | 0.53674 |
| H3  | 0.63489 | 0.61401 | 0.6735  |
| O2  | 0.4893  | 0.865   | 0.9226  |
| H3  | 0.55932 | 0.94867 | 0.58159 |
| C3A | 0.59847 | 0.8636  | 0.58222 |
| C3A | 0.65731 | 0.68056 | 0.6399  |
| O1B | 0.5556  | 0.0377  | 0.89953 |
| H3  | 0.7074  | 0.72113 | 0.67589 |
| C2A | 0.28379 | 0.62027 | 0.56092 |
| N1  | 0.09809 | 0.21937 | 0.46598 |
| H3  | 0.668   | 0.91388 | 0.5901  |
| N1  | 0.07213 | 0.04011 | 0.40736 |
| C3B | 0.60664 | 0.92446 | 0.71874 |
| H3A | 0.65361 | 0.97587 | 0.68886 |
| C2A | 0.38172 | 0.7776  | 0.61064 |

|     |         |         |         |
|-----|---------|---------|---------|
| H2  | 0.38459 | 0.86452 | 0.63265 |
| H3  | 0.58907 | 0.81798 | 0.53764 |
| N1  | 0.15748 | 0.03412 | 0.50843 |
| H3  | 0.67169 | 0.64869 | 0.59402 |
| H1  | 0.04268 | 0.20546 | 0.38481 |
| C2A | 0.47048 | 0.71183 | 0.60575 |
| H1  | 0.17895 | 0.1821  | 0.54917 |
| C3B | 0.53923 | 0.89746 | 0.82039 |
| C2A | 0.46486 | 0.59975 | 0.57753 |
| H2  | 0.53165 | 0.54577 | 0.57232 |
| C2A | 0.37201 | 0.55429 | 0.55582 |
| H2  | 0.36791 | 0.46686 | 0.5343  |
| C3B | 0.59763 | 0.96161 | 0.77992 |
| H6  | 0.63748 | 0.03432 | 0.79702 |
| C3B | 0.49968 | 0.75699 | 0.7379  |
| H3A | 0.46184 | 0.67602 | 0.72207 |
| C3B | 0.4911  | 0.79363 | 0.79893 |
| H3A | 0.44682 | 0.74231 | 0.83059 |
| C3  | 0.56924 | 0.76992 | 0.63118 |
| C2  | 0.18347 | 0.57358 | 0.5375  |
| C2A | 0.2896  | 0.73291 | 0.58838 |
| H2  | 0.22123 | 0.78472 | 0.59265 |
| C4  | 0.52726 | 0.93841 | 0.88572 |
| C3B | 0.55665 | 0.82224 | 0.69669 |
| H5  | 0.11565 | 0.90062 | 0.4555  |
| C1  | 0.14947 | 0.15194 | 0.50998 |
| C6  | 0.11422 | 0.98832 | 0.45714 |
| C1  | 0.06561 | 0.1576  | 0.4139  |

## 2. Comparison of Enthalpy of Adsorption:

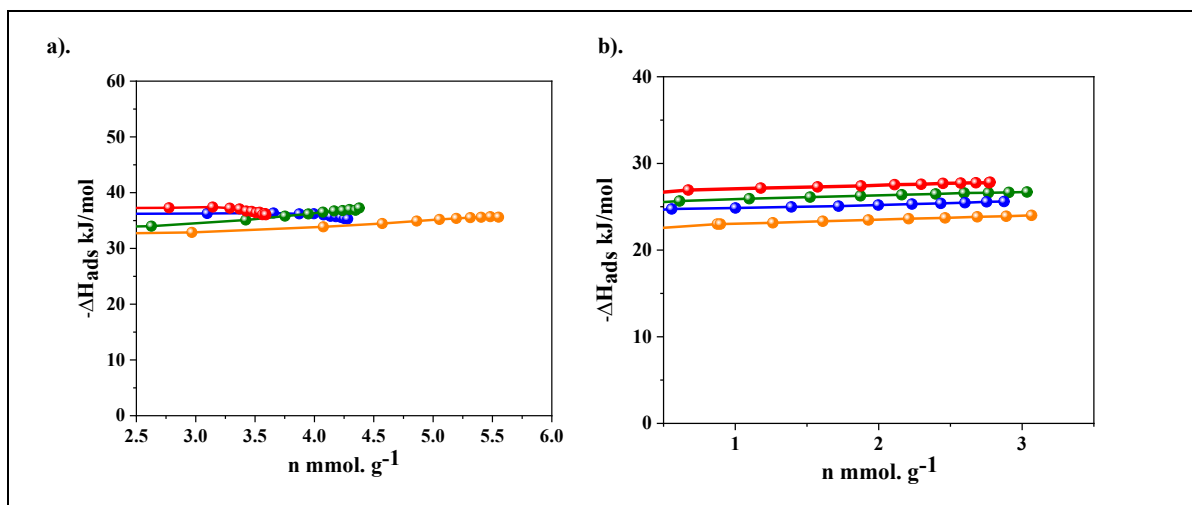



**Figure-S4:** Comparison of enthalpy on HbMOF series for SO<sub>2</sub> (a) and NO<sub>2</sub> (b) gas at 298K temperature. (HbMOF1, Red-sphere; HbMOF2, Green-sphere; HbMOF3, Blue-sphere; HbMOF4, Orange-sphere)

### 3. Comparison between DFT binding energy and GCMC simulations:

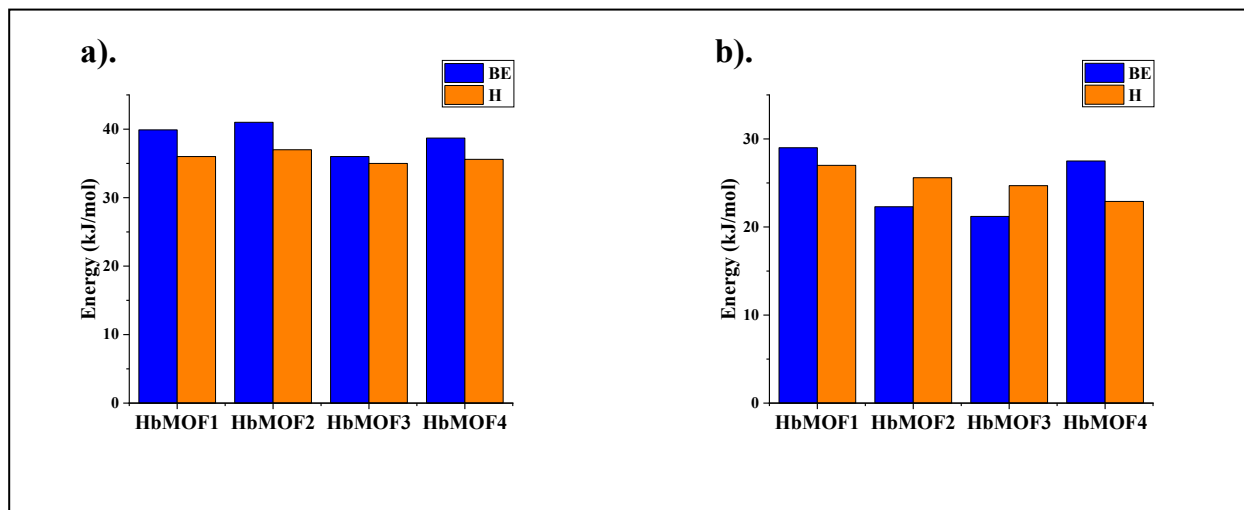

**Figure S5:** Comparison between the calculated DFT binding energy (BE) with PBE<sup>1-2</sup> functional and GCMC enthalpy of adsorption (H) at 298K for SO<sub>2</sub> (a) and NO<sub>2</sub> (b) in the HbMOF series

### 4. Comparison of cell parameters:

**Table S7:** Comparison of cell parameters between DFT optimized and experimental XRD data for HbMOF1.

| HbMOF1 | a (Å)   | b (Å)   | c (Å)   | $\alpha$ (°) | $\beta$ (°) | $\gamma$ (°) |
|--------|---------|---------|---------|--------------|-------------|--------------|
| Exp    | 13.2013 | 11.2188 | 21.4127 | 90           | 92.970      | 90           |
| Sim    | 13.3160 | 11.2750 | 21.5640 | 90           | 92.970      | 90           |

### 5. Single component isotherm of SO<sub>2</sub> gas at low pressure

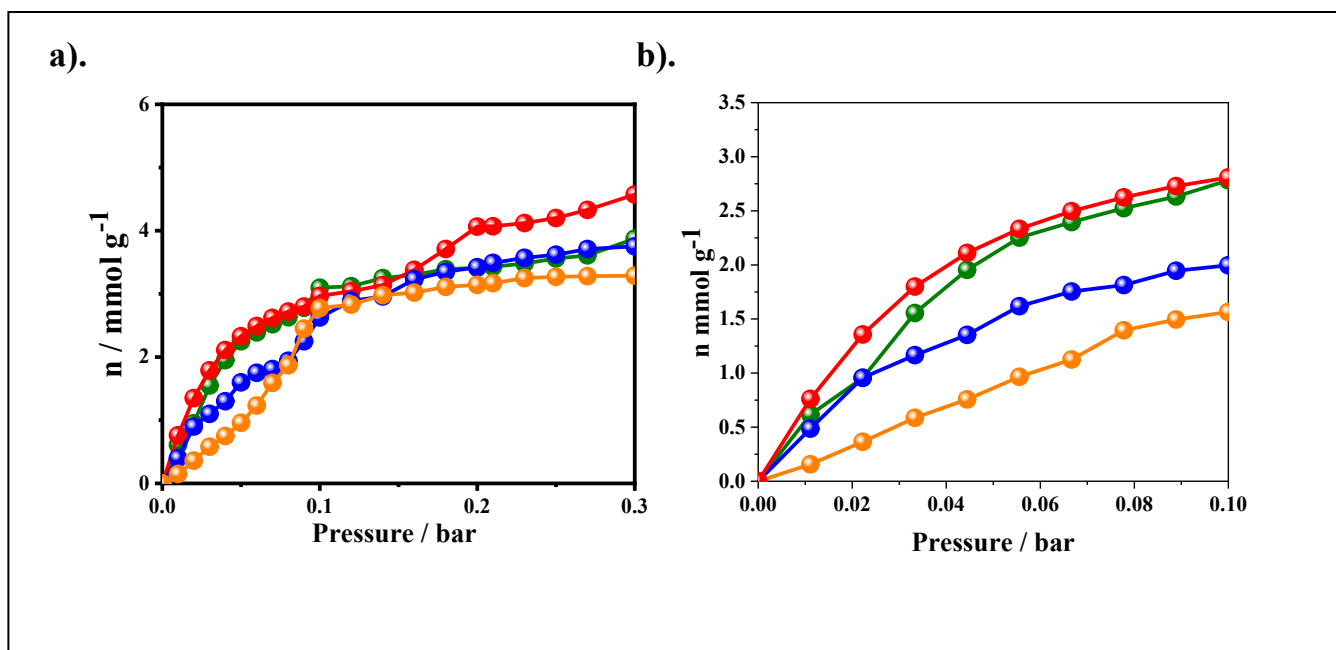

**Figure S6:** Single component isotherm of SO<sub>2</sub> gas in HbMOF series at 298K and low-pressure a) 0.1-0.3 bar pressure and b) 0-0.1 bar pressure (HbMOF1, Red; HbMOF2, Green; HbMOF3, Blue; HbMOF4, Orange)

## 6. Theoretical surface area for the HbMOF series:

**Table S8:** Theoretical surface area for the hypothetical surface area for HbMOF series

| Material | Theoretical Surface area (m <sup>2</sup> g <sup>-1</sup> ) |
|----------|------------------------------------------------------------|
| HbMOF2   | 261                                                        |
| HbMOF3   | 247                                                        |
| HbMOF4   | 230                                                        |

## 7. GCMC Trials

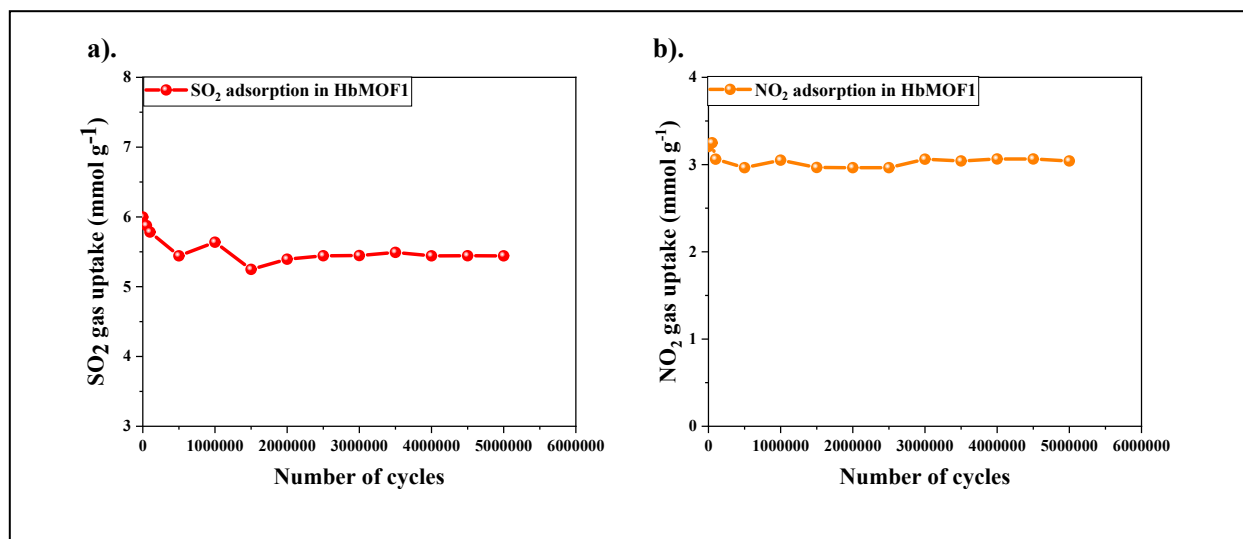

**Figure S7:** Amount of SO<sub>2</sub> (a) and NO<sub>2</sub> (b) gas adsorbed in each of the initialization cycles in the HbMOF1

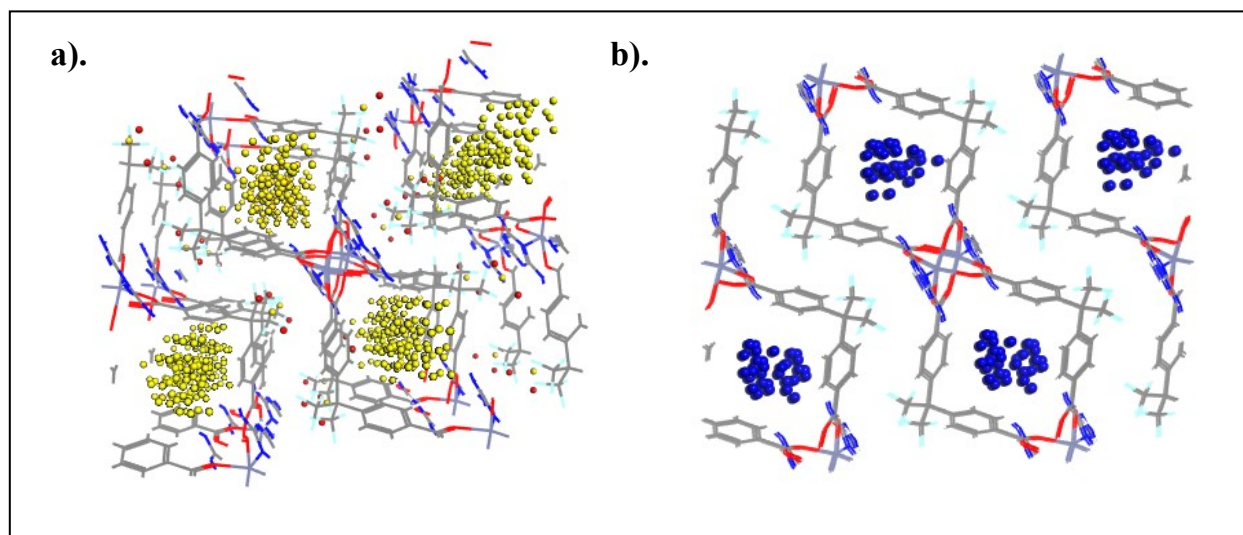

**Figure S8:** Probabilities of SO<sub>2</sub> (a) and NO<sub>2</sub> (b) gas adsorption of HbMOF1 from the GCMC trials

## 8. CO<sub>2</sub> gas adsorption on the computationally modelled HbMOFs:

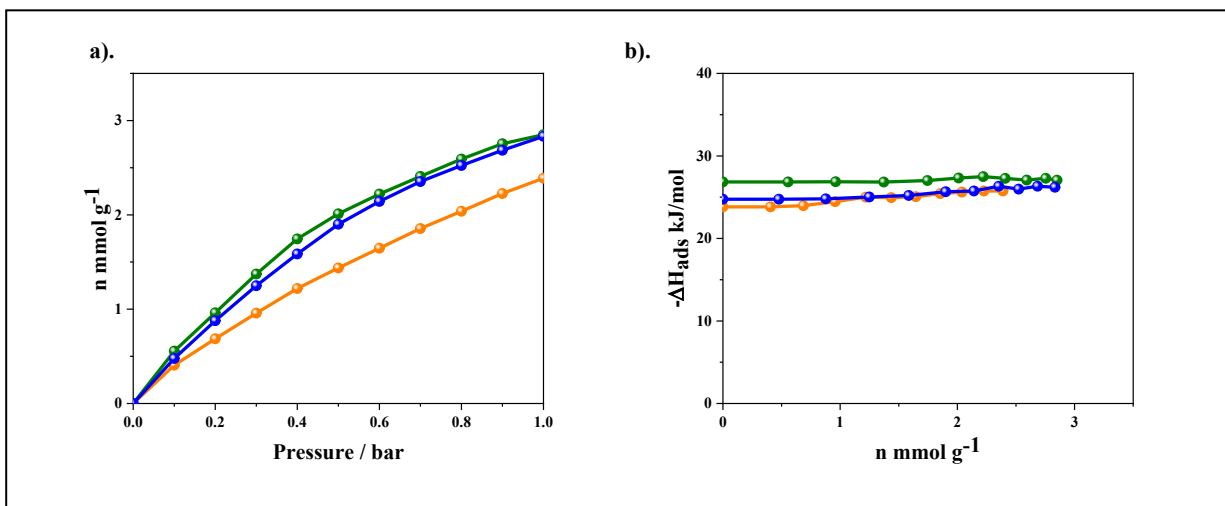

**Figure-S9:** Simulated CO<sub>2</sub> adsorption isotherm at 298K (a) and heat of enthalpy (b) of HbMOF2, Green-sphere; HbMOF3, Blue sphere; HbMOF4, Orange sphere.

## 9. Radial Distribution Functions for calculated single component isotherm:

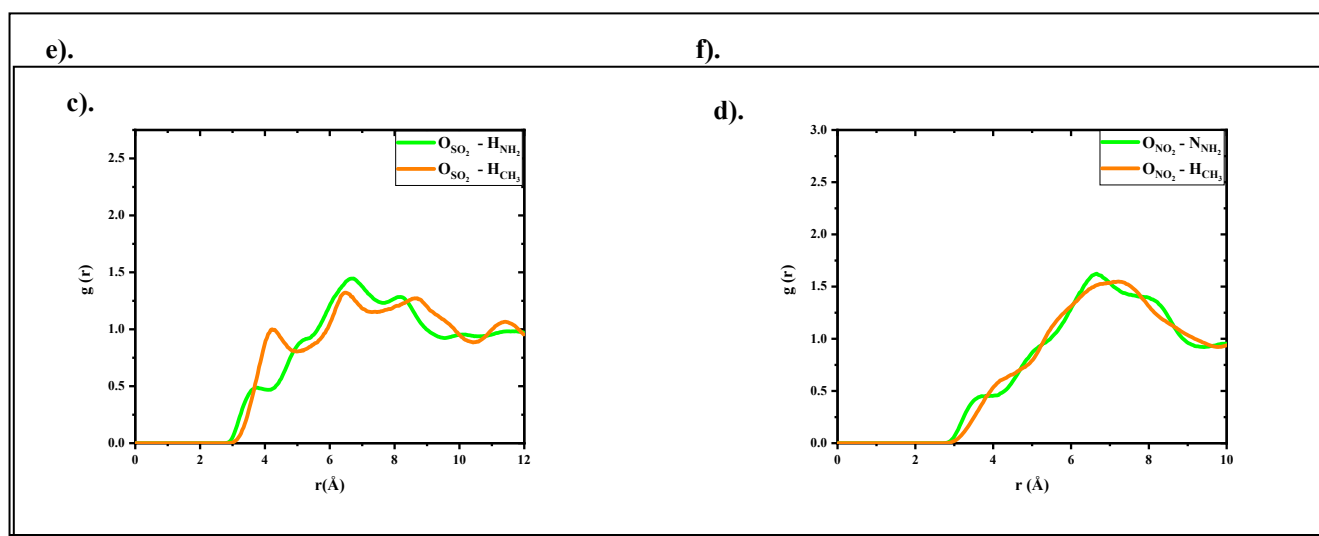

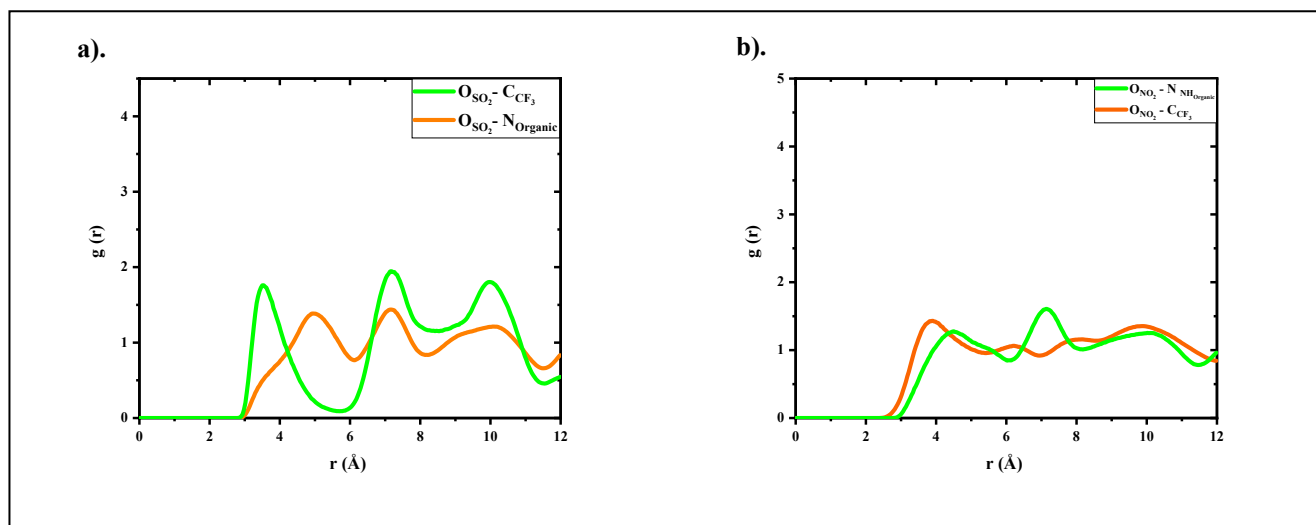

**Figure-S10:** RDF extracted from the GCMC simulations on  $\text{SO}_2$  and  $\text{NO}_2$  on HbMOF series at 1 bar and 298K: HbMOF-2 [(a) –  $\text{SO}_2$ , (b) –  $\text{NO}_2$ ], HbMOF-3 [(c) –  $\text{SO}_2$ , (d) –  $\text{NO}_2$ ] and HbMOF-4 [(e) –  $\text{SO}_2$ , (f) –  $\text{NO}_2$ ] at 298K temperature.

### 10. Maps of the occupied positions of $\text{SO}_2$ and $\text{NO}_2$ :

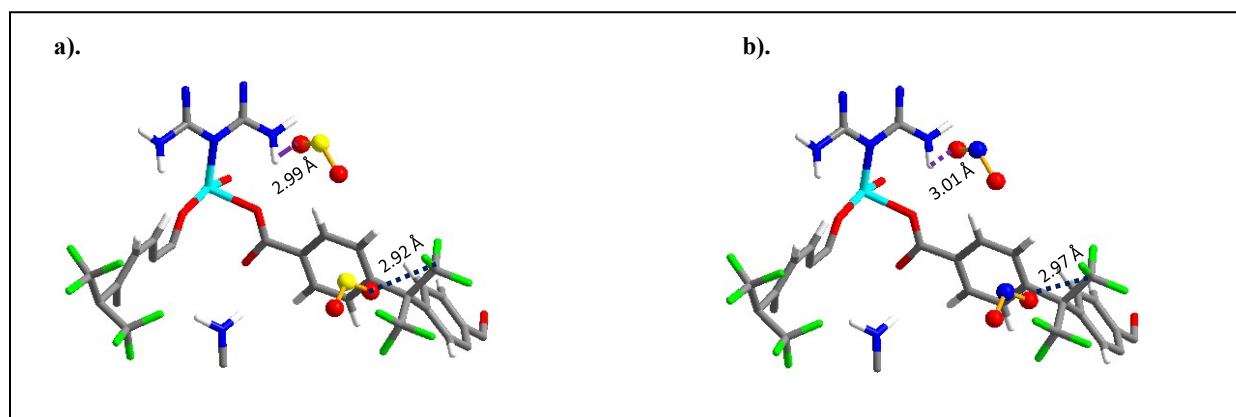

**Figure-S11:** Local view for the  $\text{SO}_2$  (a) and  $\text{NO}_2$  (b) interacting distances with functional groups  $-\text{CF}_3$  and  $-\text{NH}_2$  of HbMOF-1 obtained from the GCMC simulations at 298K and 1 bar.

### 11. DFT calculation on catalysis using HbMOF-1:

Periodic DFT calculations were carried out in the mixed gaussian plane wave scheme as implemented in the CP2K package with DFT-D3 dispersion corrections. PBE functional was used to calculate the exchange-correlation energy. The triple zeta basis set was considered for Carbon, Nitrogen, Oxygen, Fluorine and Hydrogen whereas the double zeta basis set was considered for Zinc metal. The pseudopotentials that were used in the calculations were derived by Goedecker, Tetter and Hutter. The cut-off energy and basis set for this catalytic fixation were considered from the previous work<sup>15</sup>. The cut-off for the calculation was fixed as 300Ry. The relative energies were computed with the total energy of the corresponding system as mentioned in the eqn.1.

$$E_{relative} = E_{stage} - (E_{HbMOF} - E_{CO_2} - E_{PO}) \quad (1)$$

Where  $E_{stage}$ ,  $E_{MgMOF}$ ,  $E_{CO_2}$  and  $E_{PO}$  represents the total energies of the HbMOF-1 with each stage of the mechanism. The transition state of the reaction pathway was calculated through the climbing image nudged elastic band method. (CI-NEB).

## References :

1. J. P. Perdew, *Phys Rev B.*,1986, **33**, 8822-8824.
2. J.P.Perdew, K.Burke, and M. Ernzerhot, *Phys.Rev.Lett.* 1996, **77**, 3865-3868.
3. T.D.Kühne.;M.Iannuzzi,.;M.D.Ben,.;V.V.Rybkin,.;P.Seewald,.;F.Stein;T.Laino;R.Z.Khaliullin ;O.Schütt;F.Schiffmann;D.Golze;J.Wilhelm;S.Chulkov;M.H.BaniHashemian;V.Weber;U.Bo rstnik;M.Taillefumier;A.S.Jakobovits;A.Lazzaro;H.Pabst;T.Müller;R.Schades;M.Guidon;S. Andermatt;N.Holmberg;G.K.Schenter;A.Hehn;A.Bussy;F.Belleflamme;G.Tabachi;A.Glöß; M.Lass;L.Bethune;C.J.Mundy;M.Plessl,C.Watkins;J.VandeVondele;M.Krack;J.Hutter. *J.Chem.Phys.***2020**,152, 194103-194150.
4. K. Boguslawski, C.R. Jacob and M. Reiher, *J. Chem. Phys.*,2013, **138**, 044111-044127.
5. J. VandeVondele and J. Hutter, *J. Chem. Phys.*,2007, **127**, 114105—114113.
6. S.Grimme; J.Antony; S.Ehrlich; H.A.Krieg *J. Chem. Phys.* **2010**, 132, No. 154104.
7. A.K.Rappe,; C.J.Casewit; K.S.Colwell; W.A.Goddard; W.M.Skiff. *J. Am. Chem. Soc.* **1992**, 114, 10024–10035.
8. S.L.Mayo; B.Olafson; W.A.Goddard. *J. Phys. Chem. A.***1990**, 94, 8897–8909.

9. E.Bourasseau; V.Lachet; N.Desbiens; J.B.Maillet; J.M.Teuler; P.Ungerer *J. Phys. Chem. B* **2008**, 112, 15783-15792.
10. M.H.Ketko; G.Kamath; J.J.Potoff. *J. Phys. Chem. B* **2011**, 115, 4949-4954
11. C.Campana; B.Mussard; T.Woo. *J. Chem. Theory Comput.* **2009**, 5, 2866–2878.
12. D. Dubbeldam; S. Calero; D.E.Ellis; R.Q.Snurr, *Mol. Simulat.* **2016**, 42, 81–101.
13. D.-Y.Peng; D.B.Robinson; *Ind. Eng. Chem.Fundam.* **1976**, 15, 59-64.
14. T.J.H.Vlugt; E.Garcia-Perez; D.Dubbeldam; S.Ban; S.Calero *J.Chem. Theory Comput.* **2008**, 4, 1107-1118.
15. J. Ye and J. K. Johnson, *ACS Catal.*, 2015, **5**, 2921-2928.
